# Supplementary material for: Controlling morphology and crystalline structure in poly(3-hexylselenophene) solutions during aging
Source: Royal Society of Chemistry journal article supplement (doi:10.1039/c5ra24266e), 2015-01-01
Supplement: c5ra24266e1.pdf [file c5ra24266e1.pdf]

## Supporting Information

### Controlling morphology and crystalline structure in poly(3-hexylselenophene) solutions during aging

Yue Wang,<sup>a</sup> Xiaofeng Liu,<sup>b</sup> Juan Peng,<sup>\*a</sup> and Feng Qiu<sup>\*a</sup>

<sup>a</sup> State Key Laboratory of Molecular Engineering of Polymers, Collaborative Innovation Center of Polymers and Polymer Composite Materials, Department of Macromolecular Science, Fudan University, Shanghai 200433, China

<sup>b</sup> Department of Chemistry, Fudan University, Shanghai 200433, China

**Synthetic procedures of P3HS.** The P3HS was synthesized by a catalyst-transfer Kumada polycondensation. 2,5-bromo-3-hexylselenophene (1.75 g, 4.7 mmol) was dissolved in THF (50 ml) in a three-neck flask and stirred under N<sub>2</sub>. After cooling the solution to 0 °C, isopropylmagnesium chloride (*i*-PrMgCl) in THF (2.35 mL, 4.7 mmol) was added and the mixture was stirred for 30 min. Then the solution was heated to 35 °C and followed by the addition of (1,3-bis(diphenylphosphino)-propane)-dichloronickel(II) Ni(dppp)Cl<sub>2</sub> catalyst (0.0675 g, 0.124 mmol). The resulting mixture was stirred at 35 °C for 2 h. The reaction was quenched by adding HCl (aq) (50 wt %), and the product was precipitated into methanol and hexane and dried under vacuum to give a deep red solid. The resulted P3HS had molecular weight ( $M_n$ ) of 5600 with PDI of 1.34. <sup>1</sup>H NMR (500 MHz, CDCl<sub>3</sub>,  $\delta$ (ppm)): 7.11 (s, 1H), 2.73 (t, 2H), 1.67 (m, 2H), 1.43 (m, 2H), 0.91 (t, 3H).

**Characterization.** Gel permeation chromatography (GPC) was operated using an Agilent 1260 system equipped with both G1362A refractive-index and G1314A UV detectors (eluent: THF; calibration: polystyrene standards). <sup>1</sup>H NMR spectra were recorded on a AVANCE III HD 400MHz spectrometer in CDCl<sub>3</sub> with tetramethylsilane (TMS) as the internal standard. X-ray diffraction (XRD) was performed on a PANalytical X'Pert PRO X-ray diffractometer using Cu K $\alpha$  radiation ( $\lambda = 1.541 \text{ \AA}$ ) operating at 40 kV and 40 mA. The samples for XRD measurements were prepared by drop-casting P3HS solutions onto silicon wafers followed by evaporation of the solvent at ambient.

**Figure S1.**  $^1\text{H}$  NMR spectrum of the monomer

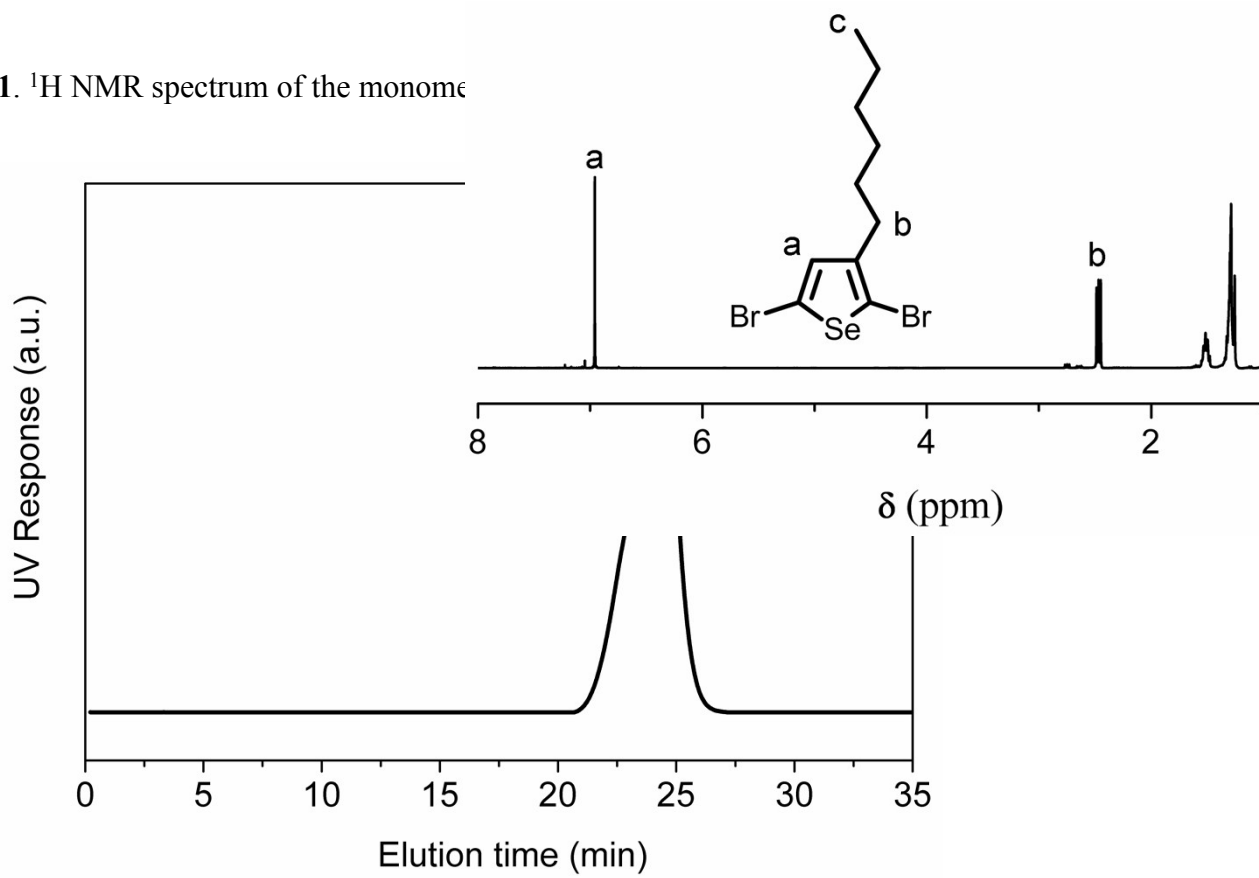

**Figure S2.** GPC profile of P3HS.

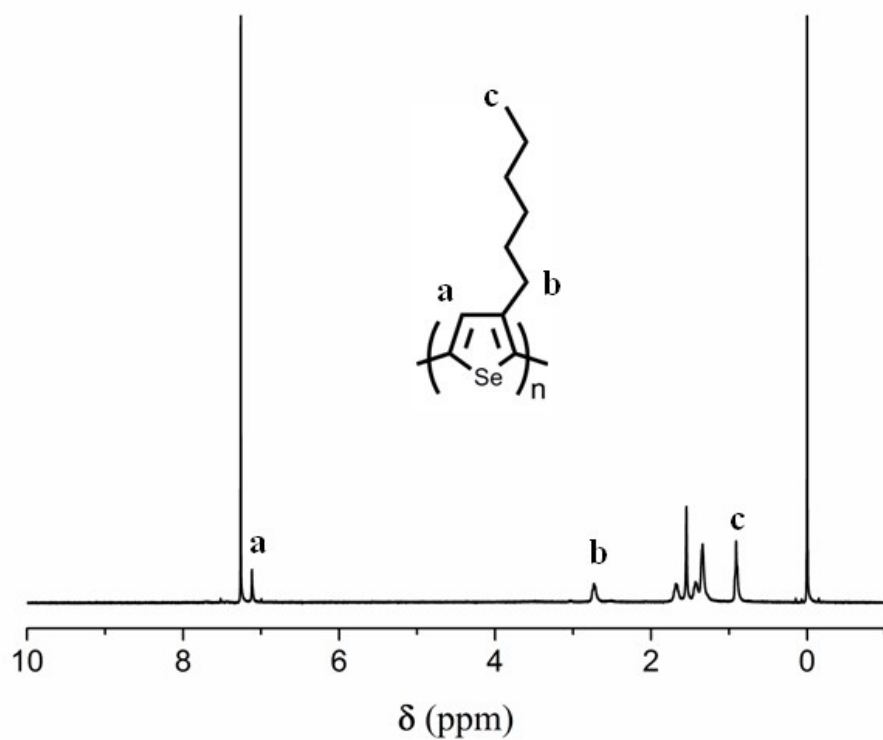

**Figure S3.** <sup>1</sup>H NMR spectrum of P3HS in CDCl<sub>3</sub>.

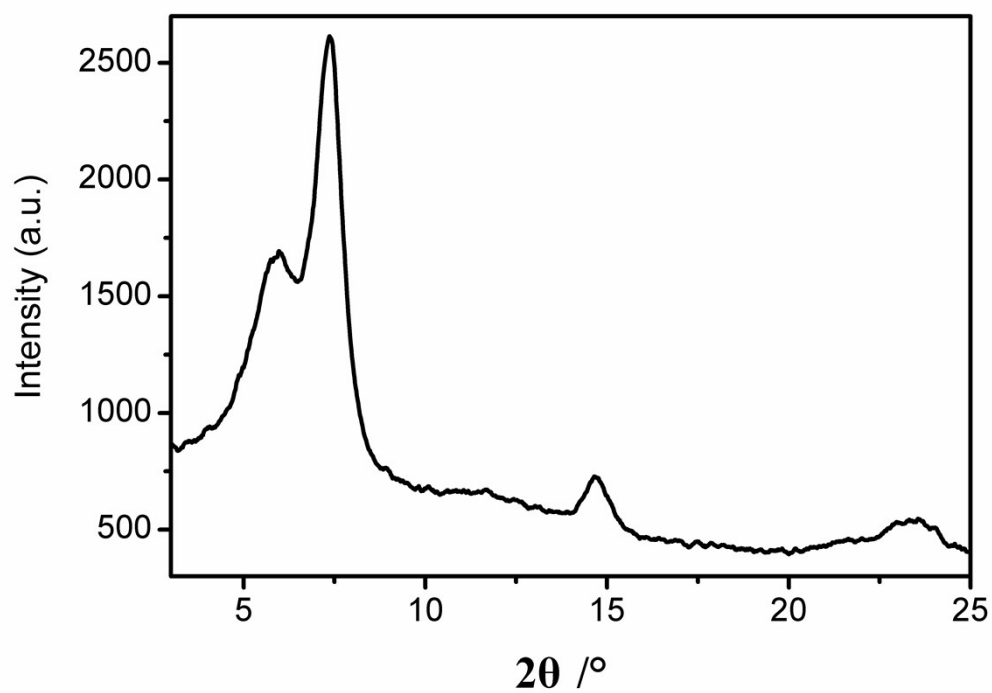

**Figure S4.** XRD profile of P3HS casted from 10 mg/mL CH<sub>2</sub>Cl<sub>2</sub> solution.
